# Supplementary material for: Characteristics of biofilm community structure in a reclaimed water cast iron pipeline
Source: Royal Society of Chemistry journal article supplement (doi:10.1039/c8ew00240a), 2018-01-01
Supplement: c8ew00240a1.pdf [file c8ew00240a1.pdf]

### Supplementary file

**Fig. S1** The evolutionary topological tree of the OTU system with four types of tube film (abundance values greater than 10)

**Fig. S2** The heat-map diagram of different tubing biofilm samples and double hierarchical clustering of bacterial communities

**Fig. S3** Top-100 features OTU in different samples of abundance heat-map

**Fig. S4** Clusters of orthologous groups (COG) of proteins comment result chart of dominant species homologous genome

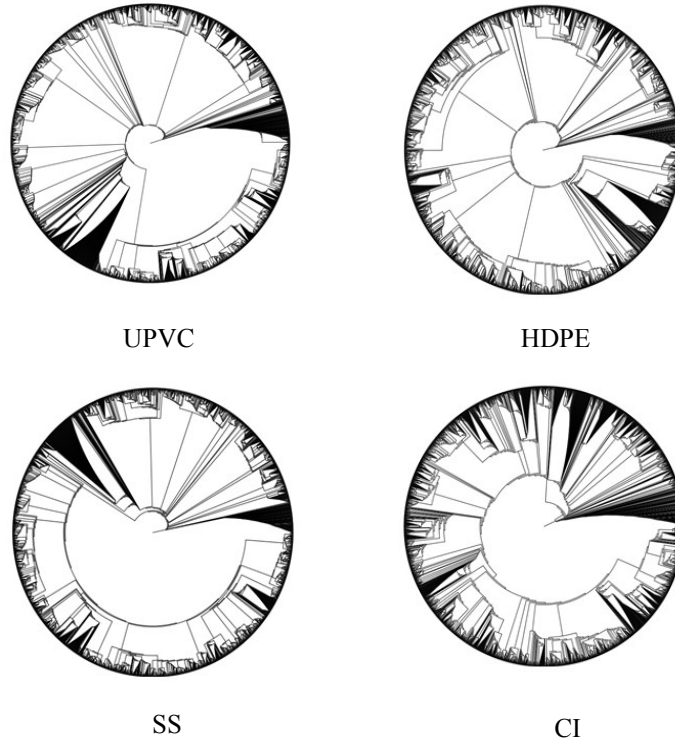

**Fig. S1** The evolutionary topological tree of the OTU system with four types of tube film (abundance values greater than 10)

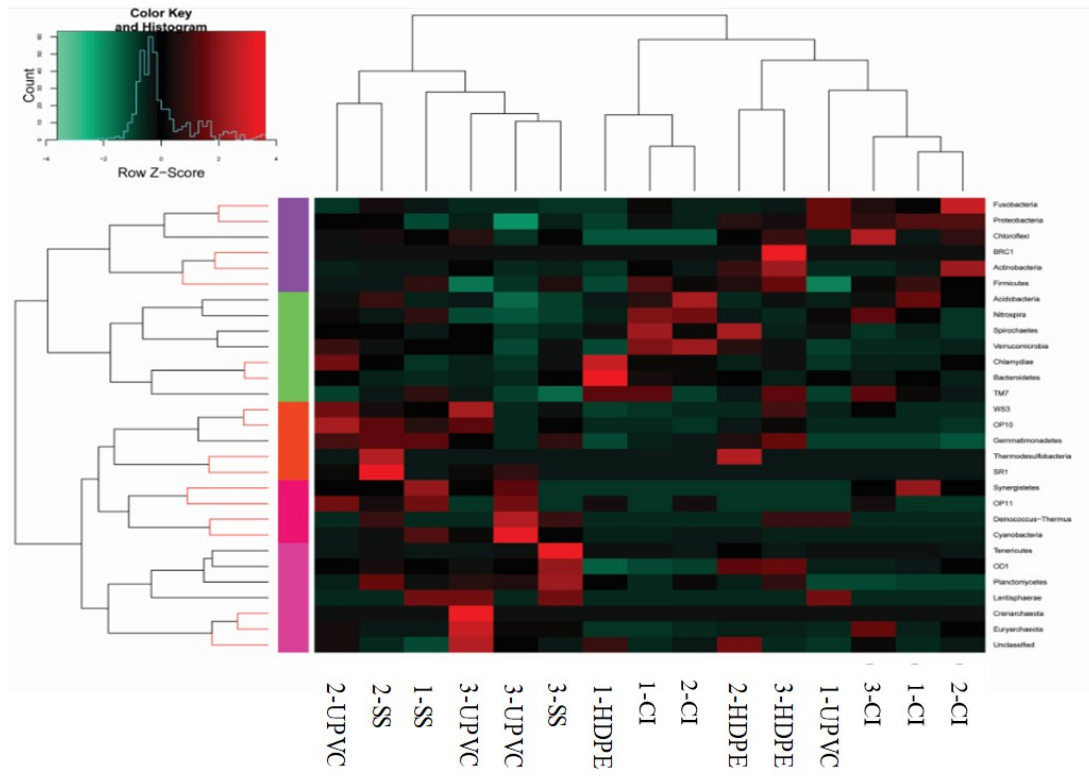

**Fig. S2** The heat-map diagram of different tubing biofilm samples and double hierarchical clustering of bacterial communities

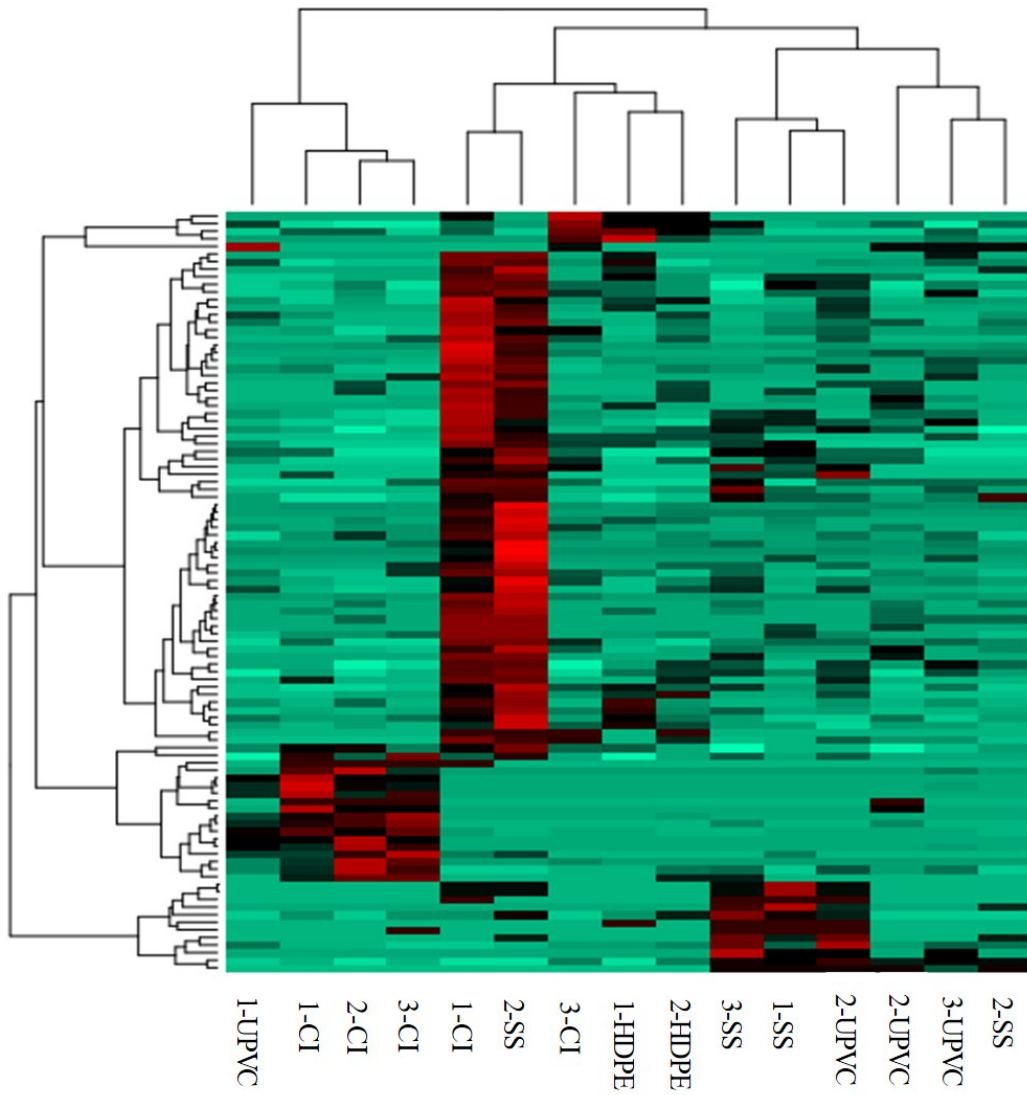

**Fig. S3** Top-100 features OTU in different samples of abundance heat-map

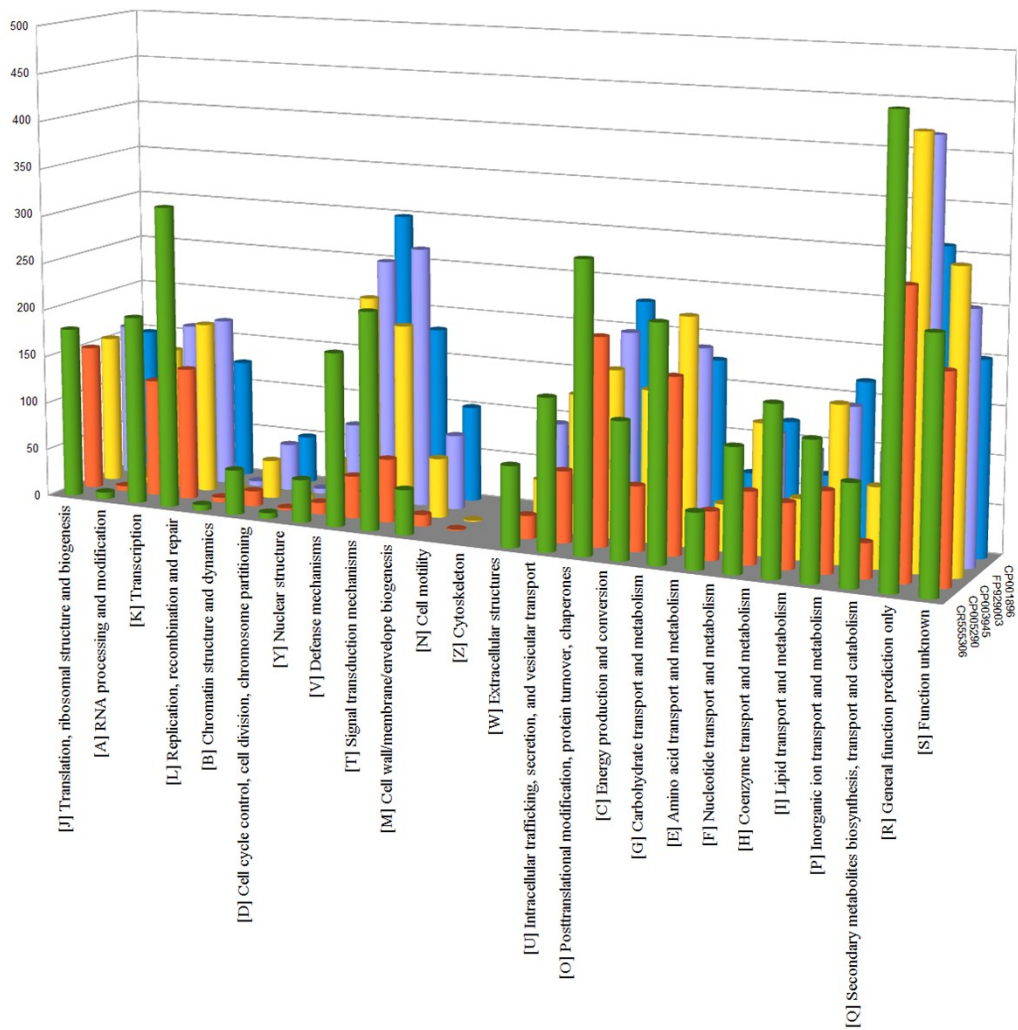

**Fig. S4** Clusters of orthologous groups (COG) of proteins comment result chart of dominant species homologous genome
